# Supplementary material
Source: Springer Nature journal article supplement (https://www.springermedizin.de/resource/supplementary/12913_2013_3011_MOESM3_ESM.docx/9533290)
Supplement: MOESM3 [file 9533290]

| **Attribute** | **Description** | **Level description (coding)** |
| --- | --- | --- |
| **Format of service** | How help and support is provided for emotional needs, communication problems and physical difficulties | Group support: as part of a group of people who have similar needs (0)  One-to-one support: on an individual basis (1) |
| **Service provider** | Who provides help and support for emotional needs, communication problems and physical difficulties | Hospital stroke team (base)  Community health team e.g. family doctor, district nurse, therapist in the community (CHT)  Voluntary organisation e.g. The Stroke Association (VO) |
| **Journey Time** | Length of time it takes to plan and make the journey to support services | 1 hour: to plan and make the journey (60)  2 hours: to plan and make the journey (120)  4 hours: to plan and make the journey (240) |
| **Additional social and leisure activities** | Social and leisure activities are provided in additional to help and support you receive, that you are able to attend on your own | Not provided (0)  Provided (1) |
